# Supplementary material for: Terrestrial protected areas maintain freshwater ecosystem resilience to costly aquatic invasive species in the Panama Canal
Source: Research Square preprint supplement (doi:10.21203/rs.3.rs-659064/v1), 2021-06-30
Supplement: Supplementary file 1 [file b8071de26c6ddd3f91e7ce76.pdf]

1  
2  
3  
4  
5  
6  
7  
8  
9  
10  
11  
12  
13  
14  
15  
16  
17  
18  
19  
20  
21  
22  
23

## Supplementary material for

### Terrestrial protected areas maintain freshwater ecosystem resilience to costly aquatic invasive species in the Panama Canal

Jorge Salgado, María I. Vélez, Catalina González-Arango, Aaron O'Dea

#### Materials and Methods

##### *Regional data of dams, tNPAs and macrophyte invasive species*

To estimate for the number of large lowland (<1000 masl) reservoirs in the American Tropics we follow<sup>1</sup> by using the location of point data of 1293 existing dams across Latin American and the Caribbean from the GRanD database<sup>2</sup>; as well as 1436 hydropower dams from the FHReD database<sup>3</sup> that are planned or under construction. These dam datasets include dams across the regions with more than 0.1 km<sup>3</sup> storage capacity and only hydroelectric dams with a power capacity >1 MW for FHReD. The identified dam locations were then overlaid with polygons from the World Database of Protected Areas (WDPA)<sup>4</sup> considering terrestrial natural protected areas (tNPAs) with national, regional, and international designations. Protected dams were defined here as those having a direct adjacent influence from a tNPA (i.e., any lake littoral area falling within a tNPA). In this sense, other forms of river protection such as headwaters inclusions within PNAs were excluded.

To explore the extent of macrophyte IAS occurrences in protected reservoirs, eleven well-known nuisance macrophyte species (native and non-native) for Latin America and the Caribbean were selected. These were: *Alternanthera philoxeroides*, *Egeria densa*, *Egeria najas*, *Eichhornia crassipes*, *Eichhornia azureus*, *Myriophyllum aquaticum*, *Myriophyllum*

24 *spicatum*, *Pistia stratiotes*, *Salvinia auriculata*, *Typha angustifolia*, and *Urochloa*  
25 *subquadrifera*. These species were selected based on the high level of invasiveness  
26 reported by<sup>5,6</sup>. Macrophyte invasive species occurrences across the region were obtained  
27 from global biodiversity information facilities, and supplemented records from literature,  
28 commercial reports, photographs and newspapers. The "Spocc" package in R<sup>7</sup> was used to  
29 download freely available occurrence data from the Global Biodiversity Information Facility  
30 (<http://www.gbif.org>), Atlas of Living Australia (<http://www.ala.org.au>), Biodiversity  
31 Information Serving Our Nation (<http://www.bison.usgs.gov>), iNaturalist  
32 (<http://www.inaturalist.org>), Ecoengine Interface  
33 (<http://www.github.com/ropensci/ecoengine>), iDigBio (<http://www.idigbio.org>), and Ocean  
34 Biographic Information System (<http://www.iobis.org>) (accessed March 2021). A limit of  
35 10,000 records per species was used for each search and any species data without  
36 georeferencing were excluded. Identified species records were then overlaid with the  
37 selected lowland protected point data of the GRanD and (FHReD) databases.

### 38 *Gatun Lake dynamics*

39 Macrophyte communities were sampled across a series of different lake sectors adjacent to  
40 tNPAs (BCNM and Península Gigante) and to sectors outside the influence of NPAs (La  
41 Represa and Bahía Trinidad; see Fig. 1 in the main text). tNPAs encompass large areas of  
42 secondary forest, whereas not protected areas are characterised by forest plantations,  
43 agricultural land, grasslands and urban centres. The main criteria for lake sectors selection  
44 were based on depicting the differences between land-uses while avoiding any other  
45 extrinsic influence from the Canal daily operations. Three extra sectors in the Chagres River

46 were further studied to assess the extent to which lake macrophyte communities may  
47 compare to the parental river.

48 Submerged, floating-leaved and emergent macrophyte (angiosperms, and charophytes)  
49 species abundance data were sampled at each selected lake sector using a modification of  
50 the UK Standard Joint Nature Conservation Committee (JNCC) protocols for site monitoring<sup>8</sup>.

51 In summary, this methodology allows for the characterization of macrophyte communities  
52 within each sector, based on 100m transects at both littoral and deeper waters, to give good  
53 spatial lake coverage<sup>9</sup>. At each 100m transect, macrophyte data is collected at four depths  
54 ranging between 25 and 75 cm at intervals of every 20m (20 points in total per transect).

55 When inner littoral areas were inaccessible due to dense floating mats, shoreline  
56 macrophyte-sampling points at the depths of 25-50 cm were assessed from a boat starting  
57 from the margins of the floating mats. Macrophytes in deeper water (depths >75cm) were  
58 also surveyed using a boat along a transect starting at the midpoint of each 100m transect  
59 and running towards the centre of the lake sector. Macrophytes were sampled at every 5m  
60 until no macrophyte was recorded or until a maximum of 10 sampling points were achieved.

61 At each sampling point, we used a combination of bathyscope and grapnel sampling, and all  
62 aquatic macrophyte species occurring within a 1m<sup>2</sup> area were recorded using a percentage  
63 plant cover score. Representation of the main macrophytes present in each lake sector was  
64 the basis for selecting the 100m transects. Seven lake sectors adjacent to NPAs were  
65 selected, with two transects per sector surveyed (n = 329 sampling points). Four lake sectors  
66 not adjacent to tNPAs were chosen with a total of nine transects surveyed (n = 212 sampling  
67 points). For the Chagres River, three sectors were selected with one 100m transect surveyed  
68 per sector (n = 44 sampling points). While this sampling approach may have missed some

69 macrophyte species known to be present in the lake, the methodology nevertheless  
70 provides a useful representation of variation in macrophyte distributions and abundances  
71 for the majority of occurring species<sup>9,10</sup>.

72 Physical-chemical data from the sampling lake sectors and the Chagres River, were derived  
73 from available monitoring data from 2012 and 2013 collected at five adjacent sampling  
74 stations. These data were obtained from “Autoridad del Canal de Panama–ACP”<sup>11</sup> and  
75 included dissolved oxygen (DO), conductivity, pH, chlorophyll-a, nitrate (NO<sub>3</sub>), and secchi  
76 depth; variables that have shown to influence macrophyte distributions in the Gatun Lake<sup>12</sup>.  
77 A direct measure of water clarity variation at each macrophyte sampling point, was further  
78 derived through a secchi depth reading at the deepest point of each transect and divided by  
79 the water depth at each sampling point<sup>13</sup>.

## 80 **Data analysis**

81 The statistical analyses focused on two complementary aspects of macrophyte community  
82 structure in the Gatun Lake<sup>14</sup>: *turnover* the directional change in assemblage composition  
83 from one sampling unit to another; and *community heterogeneity* the variation in species  
84 composition arising from shifts in species identities and abundances among groups of  
85 sampling units over time. By linking these two measures of beta diversity, the underlying  
86 nature of patterns in beta diversity that arise simultaneously from presence/absence data  
87 and relative abundance information can be better revealed<sup>14</sup>. We used a combined  
88 multivariate analysis approach of Homogeneity Analysis of Multivariate Dispersions (HMD<sup>15</sup>)  
89 and Permutational Analysis of Variance (PerMANOVA<sup>16</sup>). HMD analysis is a non-parametric  
90 method that compares variability of mean distance to a centroid (dispersion) within  
91 predefined groups (in our case lake and river sectors), to variability in this distance between

92 the predetermined groups in a PCoA<sup>15</sup>. Macrophyte community heterogeneity was defined  
93 in our study as the distance to the spatial median of the dissimilarities in macrophyte  
94 species relative abundances among sampling points, grouped respectively, within the three  
95 conservation lake sectors categories. A sector with higher values of mean distance to the  
96 group median was assumed to be characterized by greater multivariate dispersion in  
97 macrophyte species abundance between the sampling points, and hence, by greater  
98 community heterogeneity<sup>10,15</sup>). Conversely, low multivariate dispersion (lower mean  
99 distance to the group median) indicates a more homogenous community structure. The  
100 significance ( $p < 0.05$ ) of each HMD analysis was assessed via ANOVA and differences  
101 between pairs of lake and river sectors groups were then tested *post hoc* using the Tukey  
102 HSD. HMD analyses were performed using Bray-Curtis dissimilarities on *log+1* transformed  
103 macrophyte data using the *betadisper* function in the “vegan” package<sup>17</sup> and results were  
104 plotted using boxplots and PCoA plots. Given that we compared groups with unequal  
105 numbers of samples, we used the “setting bias.adjust=TRUE” in *betadisper* to impose a  
106  $\sqrt{n/(n-1)}$  correction<sup>18</sup>.

107 PerMANOVA is a non-parametric method for multivariate analysis of variance that  
108 compares the variability of average dissimilarity within groups, versus the variability among  
109 groups, using the ratio of the F-statistic through permutational tests. PerMANOVA enabled  
110 thus assessments of the significance of the community compositional heterogeneity  
111 attributed to variation in the identity of species (turnover) between the different lake and  
112 river sectors.

113 To assess how the surveyed macrophyte communities at the different study areas related to  
114 historical plant communities, we compared the survey data against a previously published

115 plant-macrofossil abundance data<sup>12</sup>. The plant-macrofossil data was derived from a dated  
116 littoral sediment core (LGAT1) taken in a lake sector outside the influence of NPAs in the  
117 southwest zone of the lake (see Fig.1 in the main text). We run a combined HMD analysis  
118 using Bray-Curtis dissimilarities on *log+1* transformed contemporary and plant macrofossil  
119 data. Prior to analysis, the plant macrofossil data was clustered into two temporal groups  
120 representing pre-canal times (i.e., pre-1913); and Gatun Lake times (i.e., 1915-present).

121 The main gradients of variation in macrophyte species and physical-chemical parameters  
122 between the different study lake sectors was explored independently via principal  
123 component analysis (PCA; “FactoMiner” R package<sup>19</sup>). The variation in water clarity values at  
124 each macrophyte sampling point was then assessed via HMD and Tukey HSD. The HMD  
125 analysis was run on Euclidean distances on *log+1* transformed water clarity data.

## 126 **References**

- 127 1. Thieme, M. L., et al. *Conserv. Letters* **13**, e12719 (2020).
- 128 2. Lehner, B., C. et al. *Front. Ecol Environ.* **9**, 494–502 (2011).
- 129 3. Zarfl, C., et al. *Aquat. Sci.* **77**, 161–170.
- 130 4. UNEP-WCMC. *Protected areas map of the world*.  
131 [www.protectedplanet.net](http://www.protectedplanet.net) (accessed in February 2021).
- 132 5. Lozano, V. & Brundu, G. *Hydrobiologia*, **812**, 115–130 (2018).
- 133 6. Lozano, V. *Ecologies*, **2**, 27–42 (2021).
- 134 7. Chamberlain, S. et al. *Spocc: R Interface to Many Species Occurrence Data Sources*. R  
135 *package version 1.1.0*. 2020. Available online: [https://CRAN.R-](https://CRAN.R-project.org/package=spocc)  
136 [project.org/package=spocc](https://CRAN.R-project.org/package=spocc) (accessed in February 2021).

- 137 8. JNCC. *Draft common standards monitoring guidance for standing waters*. Joint  
138 Nature Conservation Committee, Peterborough, UK, (2009).
- 139 9. Gunn, I. D. et al. *Hydrobiologia* **656**, 87–97 (2010).
- 140 10. Salgado, J. et al. *Ecosphere* **9**, e02406 (2018).
- 141 11. ACP- *Autoridad del Canal de Panamá. Informes de calidad del agua, Canal de*  
142 *Panamá, 2003–2013. Autoridad del Canal de Panamá, Departamento de Ambiente,*  
143 *Agua y Energía*. <https://micanaldepanama.com/nosotros/cuenca-hidrografica/>  
144 (Accessed Decmeber 2020).
- 145 12. Salgado et al. *Sci Total Environ.* **729**, 138444.
- 146 13. Salgado et al. *Riv. Reser. Appl.* (accepted)
- 147 14. Anderson, M. J., et al. *Ecol. Letters*, **14**, 19–28 (2011).
- 148 15. Anderson, M. J., et al. *Ecol. Letters*, **9**, 683–693 (2006).
- 149 16. Anderson, M. J. *Wiley statsref: statistics reference online*, 1-15
- 150 17. Oksanen, J. *The vegan package. Community ecology package*, **10**, 719 (2019).
- 151 18. Stier, A.C. et al. *Ecology* **94**, 1057–1068 (2013).
- 152 19. Husson, F. et al. *Package “FactoMineR”. An R package* **96**, 698 (2016)
- 153

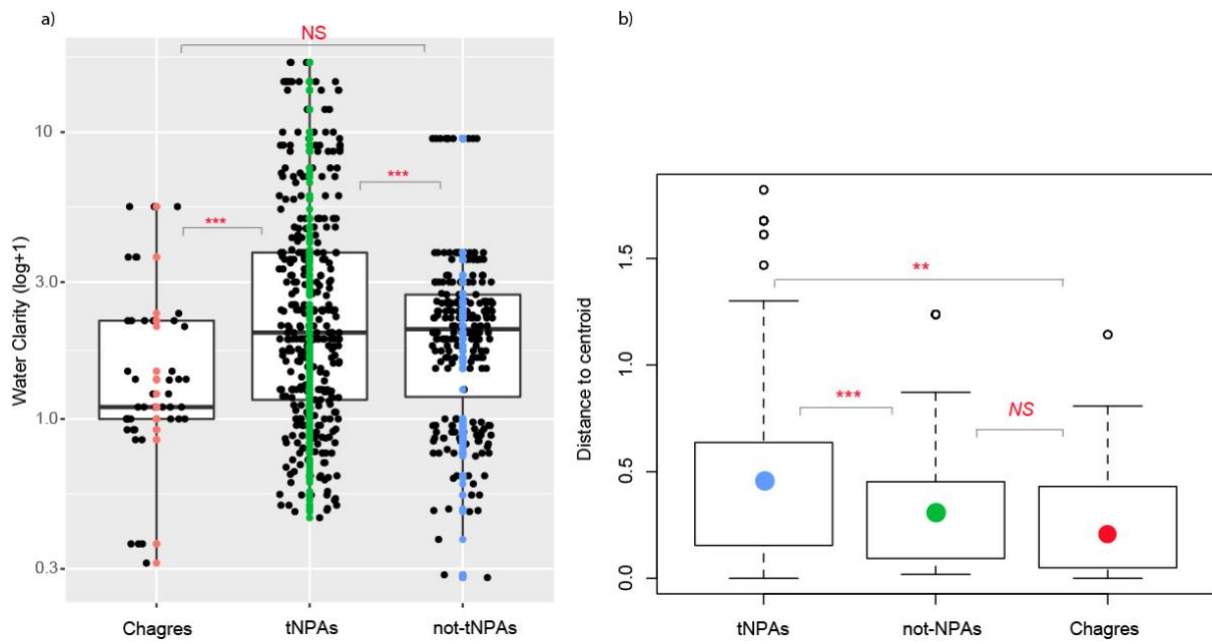

154

155 **Figure 1** Boxplots showing (a) the mean variation of water clarity at each macrophyte sampling point

156 in three study areas of the Gatun Reservoir: the Chagres River, lake areas adjacent to tNPAs, and

157 lake areas not adjacent to tNPAs (not-tNPAs); and (b) the degree of water clarity heterogeneity of

158 each study area measured via homogeneity multivariate dispersion test (HMD). The differences in

159 means and distance to mean of each study area was assessed via post hoc pairwise comparison via

160 Tukey Honest test under a significance level of  $p \leq 0.05$ . \*  $p \leq 0.05$ ; \*\*  $p \leq 0.01$ ; \*\*\*  $p \leq 0.001$ ; NS=not

161 significant.
